# Supplementary material
Source: PubMed Central journal article supplement (PMC3237832)
Supplement: NIHMS320070-supplement-01.pdf [file NIHMS320070-supplement-01.pdf]

## Gene profiling reveals a role for stress hormones in the molecular and behavioral response to food restriction

### Supplemental Information

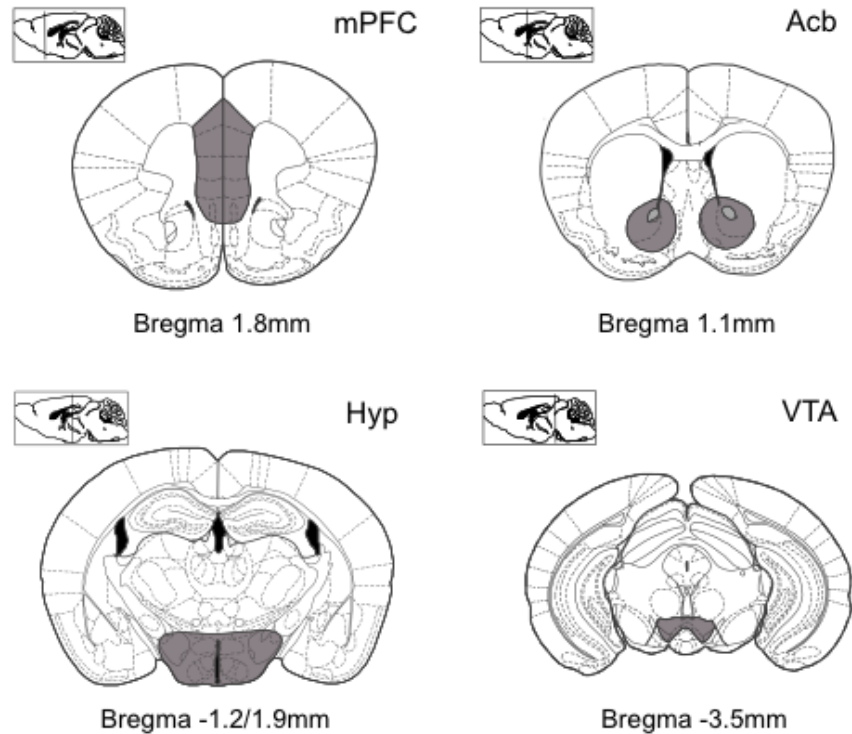

**Figure S1.** Brain regions dissected for microarray analysis. 1 mm brain slices used for microdissections. Templates adapted and reprinted with permission from Paxinos G, Franklin KBJ (2004): *The Mouse Brain in Stereotaxic Coordinates*. San Diego, CA: Academic Press. mPFC, medial prefrontal cortex; Acb, nucleus accumbens; Hyp, hypothalamus; VTA, ventral tegmental area.

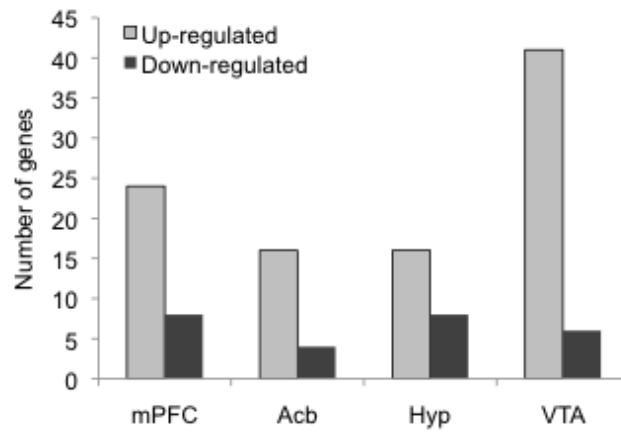

**Figure S2.** Gene expression changes in distinct regions of the mouse brain after a brief food restriction. Those changes +/- 1.5 fold change are shown. mPFC, medial prefrontal cortex; Acb, nucleus accumbens; Hyp, hypothalamus; VTA, ventral tegmental area.

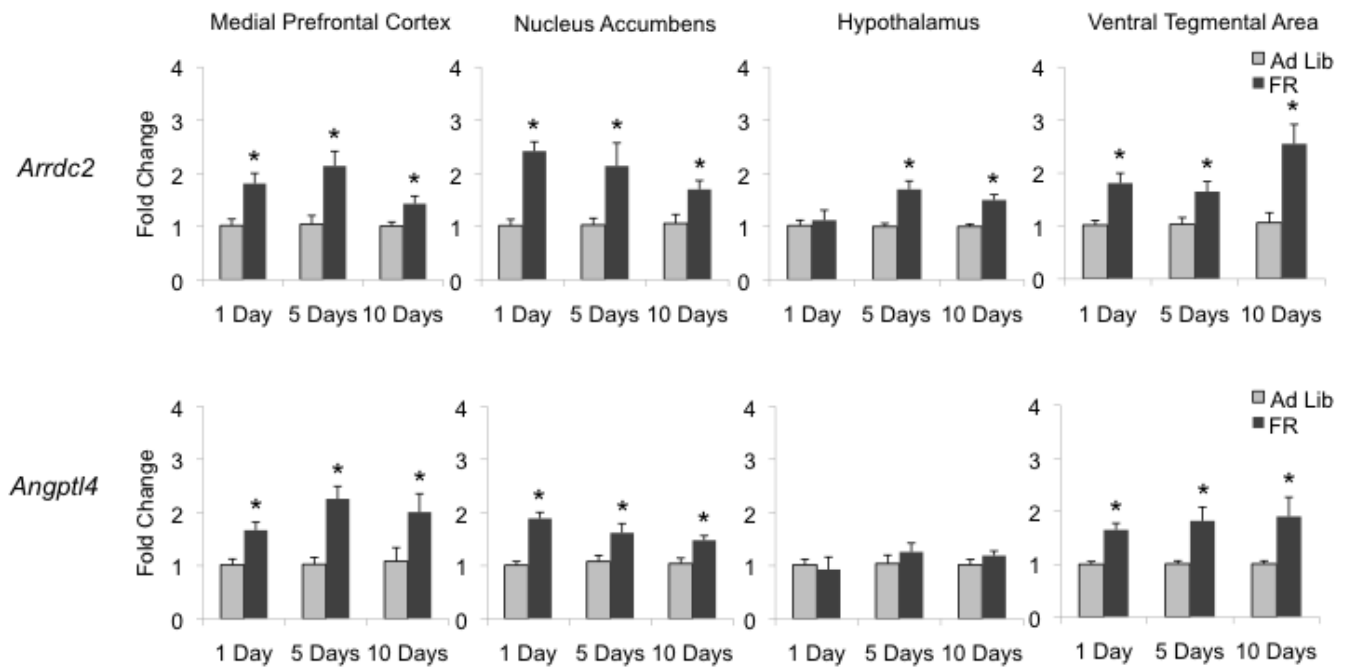

**Figure S3.** Time course of changes in gene expression are rapid and persistent. *Angptl4* and *Arrdc2* gene expression was analyzed in independent cohorts of 1, 5, and 10 day food restricted mice. *Angptl4* was significantly up-regulated at all three time points in the medial prefrontal cortex, nucleus accumbens and ventral tegmental area, but was not significantly up-regulated at any time point in the hypothalamus. *Arrdc2* was significantly up-regulated at all three time points in the medial prefrontal cortex, nucleus accumbens and ventral tegmental area, and was up-regulated at 5, and 10 day time points in the hypothalamus. The 5-day nucleus accumbens data is identical to that shown in Figure 2 and is shown here again for completeness. Ad Lib, *ad libitum* fed; FR, food restricted. \*  $p < 0.05$ ,  $n = 5$  mice per group.

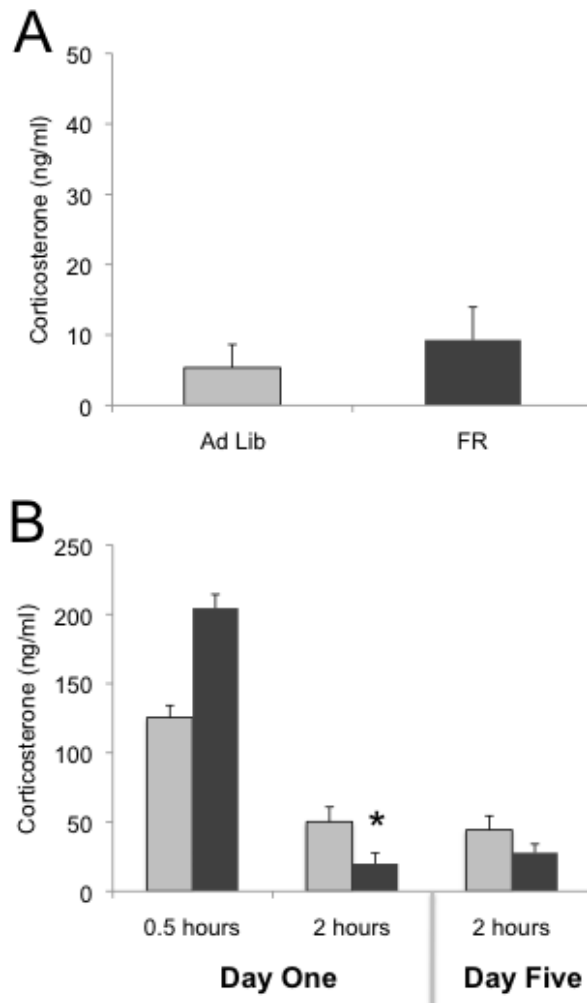

**Figure S4.** Corticosterone (CORT) levels support role in mediating observed gene expression. **(A)** Blood plasma corticosterone levels were measured in adrenalectomized animals provided with *ad libitum* diet (Ad Lib) or food restricted for 5 days (FR). There is no significant difference between Ad Lib and FR indicating corticosterone is virtually absent in adrenalectomized animals.  $n = 5$  mice per group. **(B)** Blood plasma corticosterone levels were measured in Ad Lib fed animals receiving intraperitoneal injections of vehicle (Veh, gray bars) or corticosterone (black bars) at different time points. As expected, levels are initially quite high at 0.5 hours and after another 1.5 hours suggest negative feedback. After the fifth day of injection, there is no significant difference between the Veh and CORT groups. \*  $p < 0.05$ ,  $n = 2$  for 0.5 hours and  $n = 5$  for the other time points.

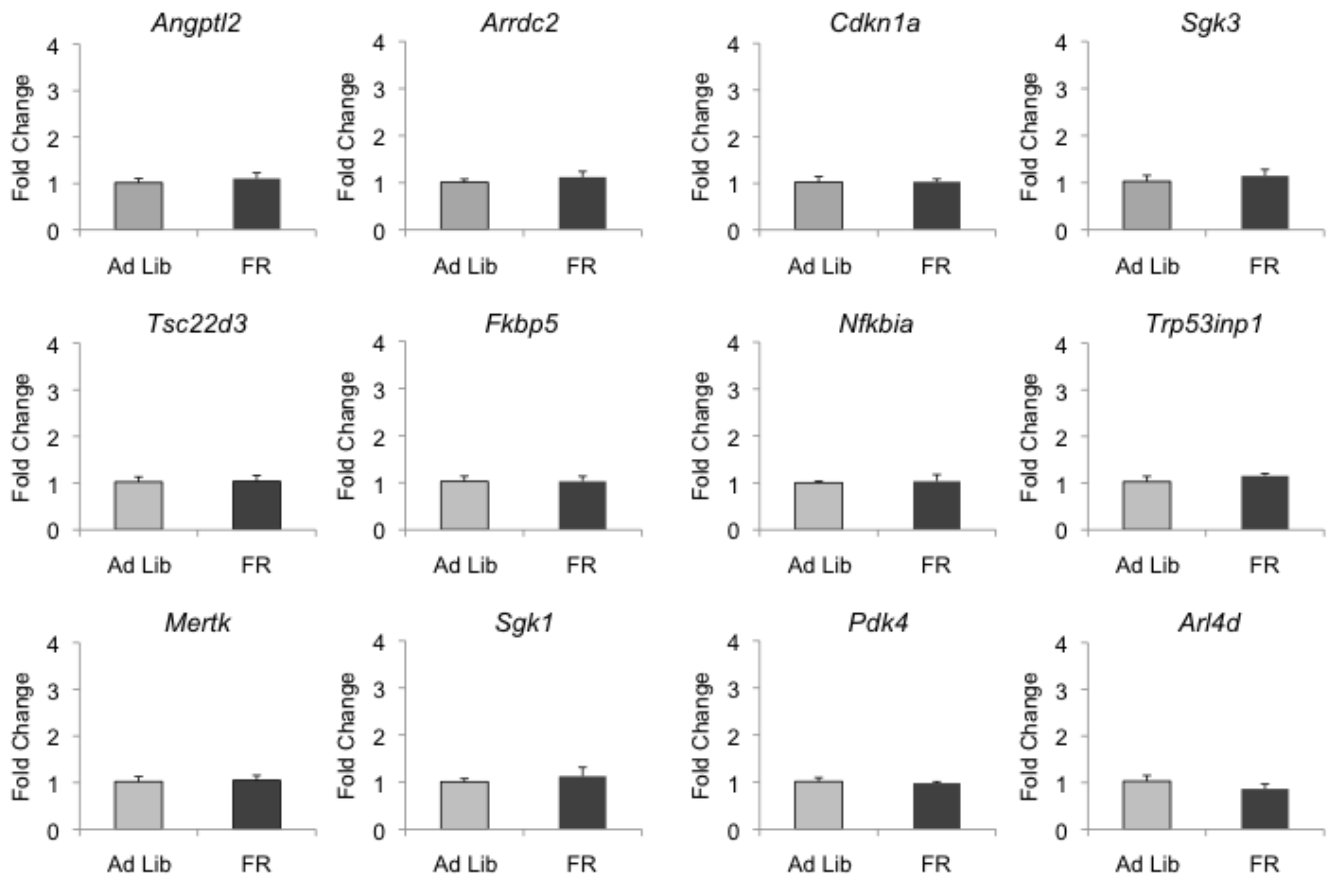

**Figure S5.** Adrenal glands are necessary for gene up-regulation during food restriction. Within the nucleus accumbens, gene expression of adrenalectomized mice food restricted (FR) for 5 days was not significantly different than adrenalectomized mice fed *ad libitum* (Ad Lib). The *Cdkn1a*, *Angptl4* and *Arrdc2* data are the same as in Figure 2 and are shown here again for completeness.  $n = 5$  mice per group.

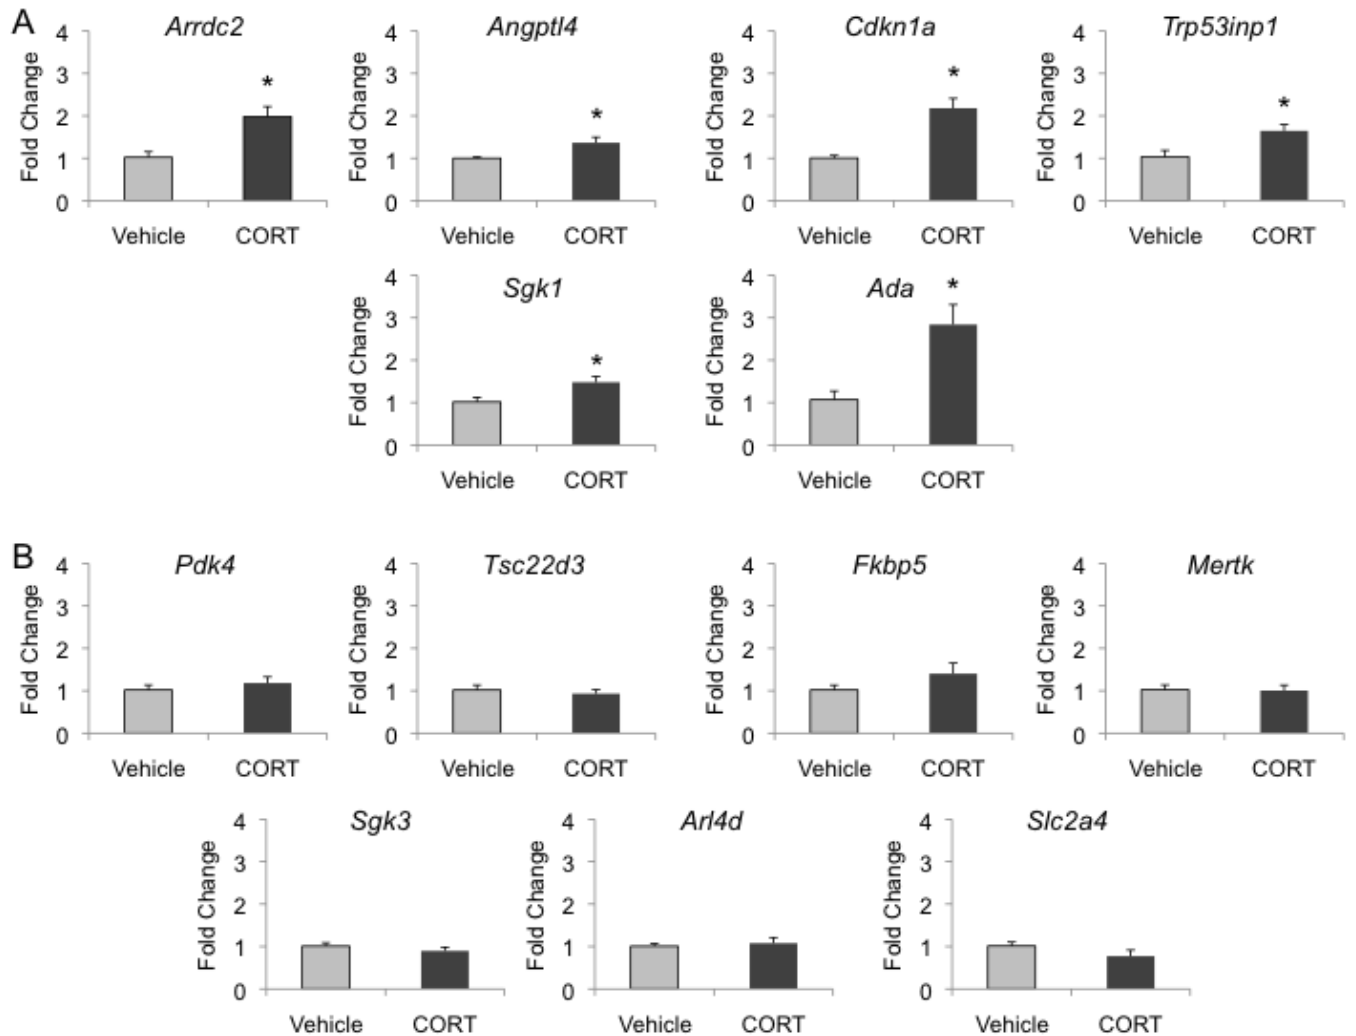

**Figure S6.** Repeated corticosterone exposure is sufficient to up-regulate a subset of qPCR validated genes. Animals were i.p. injected with vehicle or corticosterone for 5 days and gene expression changes were measured in the nucleus accumbens. **(A)** A subset of validated genes shows an up-regulation upon corticosterone treatment in the fully fed state. **(B)** However, another subset of genes was not up-regulated in the same animals. The *Arrdc2* and *Pdk4* data are the same as in Figure 3 and are shown here again for completeness. CORT, corticosterone; i.p., intraperitoneal; qPCR, quantitative polymerase chain reaction. \*  $p < 0.05$ ,  $n = 5$  mice per group.

**Table S1.** Gene lists by brain region showing those regulated +/- 1.5 fold.

| Gene Symbol                     | Accession      | Fold Change | P value | Gene Symbol              | Accession      | Fold Change | P value |
|---------------------------------|----------------|-------------|---------|--------------------------|----------------|-------------|---------|
| <b>Medial Prefrontal Cortex</b> |                |             |         | <b>Nucleus Accumbens</b> |                |             |         |
| <i>Creg2</i>                    | NM_170597      | 3.538       | 0.049   | <i>Insm1</i>             | NM_016889.2    | 1.928       | 0.044   |
| <i>Frmd3</i>                    | NM_172869      | 2.067       | 0.047   | <i>Nuak2</i>             | NM_028778      | 1.882       | 0.001   |
| <i>Hif3a</i>                    | Q0VBL6         | 2.042       | 0.049   | <i>Angptl4</i>           | NM_020581.1    | 1.861       | 0.033   |
| <i>Insm1</i>                    | NM_016889.3    | 2.031       | 0.045   | <i>Antxr2</i>            | NM_133738.1    | 1.832       | 0.008   |
| <i>Ccdc148</i>                  | XM_906580.3    | 1.930       | 0.047   | <i>Ada</i>               | P03958         | 1.822       | 0.003   |
| <i>Folh1</i>                    | NM_016770.3    | 1.876       | 0.049   | <i>Mro</i>               | NM_027741.2    | 1.821       | 0.033   |
| <i>Angptl4</i>                  | NM_020581      | 1.865       | 0.046   | <i>Tsc22d3</i>           | NM_001077364.1 | 1.767       | 0.002   |
| <i>Grhl1</i>                    | NM_145890      | 1.815       | 0.045   | <i>Arrdc2</i>            | NM_027560.1    | 1.719       | 0.000   |
| <i>Kctd8</i>                    | NM_175519      | 1.769       | 0.045   | <i>Flnb</i>              | Q80X90         | 1.704       | 0.021   |
| <i>Trp53inp1</i>                | NM_021897      | 1.762       | 0.045   | <i>Ly6d</i>              | P35459         | 1.699       | 0.017   |
| <i>Trank1</i>                   | XM_001481067.1 | 1.760       | 0.045   | <i>Zic3</i>              | NM_009575.2    | 1.696       | 0.040   |
| <i>Tsc22d3</i>                  | NM_001077364.1 | 1.742       | 0.045   | <i>Gsta3</i>             | P30115         | 1.600       | 0.000   |
| <i>Rin1</i>                     | Q921Q7         | 1.660       | 0.043   | <i>Pnma3</i>             | NM_153169      | 1.585       | 0.032   |
| <i>Dner</i>                     | NM_152915      | 1.641       | 0.044   | <i>Khdrbs2</i>           | NM_133235      | 1.551       | 0.021   |
| <i>Arrdc2</i>                   | NM_027560      | 1.636       | 0.044   | <i>Pdk4</i>              | O70571         | 1.525       | 0.006   |
| <i>Arrdc2</i>                   | NM_134133      | 1.618       | 0.043   | <i>Rragb</i>             | NM_001004154.1 | 1.501       | 0.007   |
| <i>2010002N04Rik</i>            | NM_134133      | 1.551       | 0.004   | <i>Wasf3</i>             | NM_145155      | -1.704      | 0.023   |
| <i>Padi6</i>                    | Q8K3V4         | 1.550       | 0.045   | <i>Hltf</i>              | NM_009210      | -1.643      | 0.030   |
| <i>Amy1</i>                     | P00687         | 1.546       | 0.044   | <i>Nkd1</i>              | NM_027280      | -1.641      | 0.048   |
| <i>Scn3a</i>                    | NM_018732.3    | 1.540       | 0.043   | <i>Gpx3</i>              | Q91WR8         | -1.590      | 0.021   |
| <i>Zfp189</i>                   | NM_145547      | 1.528       | 0.042   |                          |                |             |         |

| Gene Symbol          | Accession      | Fold Change | P value | Gene Symbol                   | Accession   | Fold Change | P value |
|----------------------|----------------|-------------|---------|-------------------------------|-------------|-------------|---------|
| <i>Ttc5</i>          | NM_177625      | 1.526       | 0.042   | <b>Ventral Tegmental Area</b> |             |             |         |
| <i>4833442J19Rik</i> | NM_177101.4    | 1.517       | 0.034   | <i>Tmc7</i>                   | NM_172476   | 2.516       | 0.013   |
| <i>Slc16a9</i>       | NM_025807      | 1.508       | 0.041   | <i>Oprk1</i>                  | P33534      | 2.455       | 0.000   |
| <i>Cenpf</i>         | NM_001081363.2 | -2.542      | 0.001   | <i>Arrdc2</i>                 | NM_027560   | 2.222       | 0.000   |
| <i>Gabre</i>         | NM_017369      | -1.590      | 0.005   | <i>Ada</i>                    | P03958      | 2.176       | 0.000   |
| <i>Bptf</i>          | NM_176850.2    | -1.533      | 0.005   | <i>Sgk3</i>                   | Q9ERE3      | 2.122       | 0.007   |
| <i>Fam189b</i>       | NM_001014995.1 | -1.530      | 0.006   | <i>Mxra7</i>                  | NM_026280.2 | 2.120       | 0.034   |
| <i>Cdkl5</i>         | Q8BW18         | -1.511      | 0.005   | <i>Sgk1</i>                   | Q9WVC6      | 2.116       | 0.041   |
| <i>Lasp1</i>         | NM_010688.4    | -1.503      | 0.015   | <i>Cdkn1a</i>                 | P39689      | 2.081       | 0.031   |
| <b>Hypothalamus</b>  |                |             |         | <i>Hif3a</i>                  | Q0VBL6      | 2.027       | 0.027   |
| <i>Hr</i>            | Q61645         | 2.198       | 0.001   | <i>Pdk4</i>                   | O70571      | 2.000       | 0.025   |
| <i>Ptprd</i>         | Q64487         | 2.011       | 0.028   | <i>Pdk4</i>                   | O70571      | 1.990       | 0.017   |
| <i>Sult1a1</i>       | P52840         | 2.009       | 0.032   | <i>Il12rb1</i>                | Q60837      | 1.958       | 0.001   |
| <i>1810029B16Rik</i> | 1810029B16Rik  | 1.908       | 0.018   | <i>Mgp</i>                    | P19788      | 1.925       | 0.033   |
| <i>Arrdc2</i>        | NM_027560.1    | 1.794       | 0.001   | <i>Angptl4</i>                | NM_020581   | 1.862       | 0.015   |
| <i>Dcun1d4</i>       | NM_178896.4    | 1.786       | 0.019   | <i>Cdh9</i>                   | P70407      | 1.802       | 0.034   |
| <i>Mdga2</i>         | NM_207010.1    | 1.767       | 0.039   | <i>Usp31</i>                  | XM_357781.4 | 1.754       | 0.039   |
| <i>Tsc22d3</i>       | NM_001077364.1 | 1.693       | 0.021   | <i>Hr</i>                     | Q61645      | 1.740       | 0.039   |
| <i>Sgk1</i>          | Q9WVC6         | 1.676       | 0.021   | <i>Cpeb3</i>                  | NM_198300   | 1.739       | 0.003   |
| <i>Cntnap2</i>       | Q9CPW0         | 1.671       | 0.015   | <i>Mertk</i>                  | Q60805      | 1.721       | 0.004   |
| <i>Cdkn1a</i>        | P39689         | 1.667       | 0.024   | <i>Kcns3</i>                  | NM_173417   | 1.716       | 0.008   |
| <i>Tsc22d3</i>       | NM_001077364.1 | 1.587       | 0.021   | <i>Fam83d</i>                 | NM_027975   | 1.676       | 0.040   |
|                      |                |             |         | <i>Neurog2</i>                | P70447      | 1.670       | 0.040   |



| Gene Symbol          | Accession      | Fold Change | P value | Gene Symbol          | Accession   | Fold Change | P value |
|----------------------|----------------|-------------|---------|----------------------|-------------|-------------|---------|
| <i>Rnf144b</i>       | NM_146042.3    | 1.548       | 0.012   | <i>Ccdc3</i>         | NM_028804   | 1.635       | 0.013   |
| <i>Rbm3</i>          | O89086         | 1.532       | 0.017   | <i>Nfkbia</i>        | Q9Z1E3      | 1.635       | 0.007   |
| <i>Fkbp5</i>         | Q64378         | 1.515       | 0.023   | <i>Cadps2</i>        | NM_153163   | 1.625       | 0.014   |
| <i>Arl4d</i>         | Q99PE9         | 1.510       | 0.001   | <i>Fkbp5</i>         | Q64378      | 1.613       | 0.017   |
| <i>Pdgfd</i>         | NM_027924      | 1.502       | 0.031   | <i>2610042L04Rik</i> | Q8BNC0      | 1.610       | 0.018   |
| <i>Clstn2</i>        | Q9ER65         | -1.753      | 0.020   | <i>Lrrc8</i>         | Q80WG5      | 1.603       | 0.000   |
| <i>Ramp2</i>         | NM_019444.2    | -1.712      | 0.009   | <i>Mt1</i>           | P02802      | 1.596       | 0.002   |
| <i>C530008M17Rik</i> | Q80TH6         | -1.711      | 0.007   | <i>Dcn</i>           | P28654      | 1.595       | 0.035   |
| <i>Micall1</i>       | Q8BGT6         | -1.687      | 0.011   | <i>Arl4d</i>         | Q99PE9      | 1.582       | 0.006   |
| <i>Luzp1</i>         | NM_024452      | -1.652      | 0.006   | <i>Dedd2</i>         | Q8QZV0      | 1.578       | 0.012   |
| <i>Ankrd11</i>       | NM_001081379.1 | -1.560      | 0.014   | <i>Slc2a4</i>        | P14142      | 1.556       | 0.002   |
| <i>Ankrd11</i>       | NM_001081379.1 | -1.555      | 0.018   | <i>Txnip</i>         | Q91X82      | 1.549       | 0.024   |
| <i>Rnf165</i>        | XM_129042.8    | -1.510      | 0.048   | <i>Cyp1b1</i>        | Q64429      | 1.544       | 0.048   |
| <i>Olf985</i>        | NM_146855      | -1.508      | 0.001   | <i>Slc39a4</i>       | NM_028064   | 1.539       | 0.041   |
|                      |                |             |         | <i>Slitrk1</i>       | Q810C1      | 1.529       | 0.025   |
|                      |                |             |         | <i>Itpk1</i>         | NM_172584   | 1.523       | 0.015   |
|                      |                |             |         | <i>Tns</i>           | Q7TSV1      | 1.510       | 0.024   |
|                      |                |             |         | <i>Vcam1</i>         | P29533      | 1.509       | 0.008   |
|                      |                |             |         | <i>Edn1</i>          | P22387      | 1.506       | 0.019   |
|                      |                |             |         | <i>Lrrc33</i>        | NM_146069.4 | 1.505       | 0.011   |
|                      |                |             |         | <i>Cadps2</i>        | NM_153163   | 1.434       | 0.014   |
|                      |                |             |         | <i>Calml4</i>        | NM_138304   | -2.358      | 0.038   |
|                      |                |             |         | <i>Ddo</i>           | NM_027442.5 | -2.128      | 0.018   |

| <b>Gene Symbol</b> | <b>Accession</b> | <b>Fold Change</b> | <b>P value</b> | <b>Gene Symbol</b> | <b>Accession</b> | <b>Fold Change</b> | <b>P value</b> |
|--------------------|------------------|--------------------|----------------|--------------------|------------------|--------------------|----------------|
|                    |                  |                    |                | <i>Spc25</i>       | NM_025565.2      | -2.041             | 0.009          |
|                    |                  |                    |                | <i>Lrrc23</i>      | NM_013588        | -1.554             | 0.046          |
|                    |                  |                    |                | <i>Onecut2</i>     | NM_194268        | -1.517             | 0.038          |
|                    |                  |                    |                | <i>Arl15</i>       | NM_172595.4      | -1.516             | 0.023          |

**Table S2.** qPCR validation of array genes by brain region

| <b>Gene Symbol</b>              | <b>Accession</b> | <b>Array Fold Change</b> | <b>qPCR Fold Change</b> |
|---------------------------------|------------------|--------------------------|-------------------------|
| <b>Medial Prefrontal Cortex</b> |                  |                          |                         |
| <i>Creg2</i>                    | NM_170597        | 3.538                    | n.s.                    |
| <i>Frmd3</i>                    | NM_172869        | 2.067                    | n.s.                    |
| <i>Angptl4</i>                  | NM_020581        | 1.865                    | 3.893                   |
| <i>Grhl1</i>                    | NM_145890        | 1.815                    | n.s.                    |
| <i>Trp53inp1</i>                | NM_021897        | 1.762                    | 1.602                   |
| <i>Tsc22d3</i>                  | NM_001077364.1   | 1.742                    | 1.682                   |
| <i>Rin1</i>                     | Q921Q7           | 1.660                    | n.s.                    |
| <i>Dner</i>                     | NM_152915        | 1.641                    | n.s.                    |
| <i>Arrdc2</i>                   | NM_027560        | 1.636                    | 1.634                   |
| <i>Padi6</i>                    | Q8K3V4           | 1.550                    | n.s.                    |
| <i>Amy1</i>                     | P00687           | 1.546                    | n.s.                    |
| <i>Cenpf</i>                    | NM_001081363.2   | -2.542                   | n.s.                    |
| <i>Gabre</i>                    | NM_017369        | -1.590                   | n.s.                    |
| <i>Bptf</i>                     | NM_176850.2      | -1.533                   | n.s.                    |
| <i>Cdkl5</i>                    | Q8BWI8           | -1.511                   | n.s.                    |
| <i>Lasp1</i>                    | NM_010688.4      | -1.503                   | n.s.                    |
| <b>Nucleus Accumbens</b>        |                  |                          |                         |
| <i>Angptl4</i>                  | NM_020581.1      | 1.861                    | 2.298                   |
| <i>Ada</i>                      | P03958           | 1.822                    | 2.459                   |
| <i>Mro</i>                      | NM_027741.2      | 1.821                    | n.s.                    |
| <i>Tsc22d3</i>                  | NM_001077364.1   | 1.767                    | 1.864                   |
| <i>Arrdc2</i>                   | NM_027560.1      | 1.719                    | 2.043                   |
| <i>Flnb</i>                     | Q80X90           | 1.704                    | n.s.                    |
| <i>Zic3</i>                     | NM_009575.2      | 1.696                    | n.s.                    |
| <i>Khdrbs2</i>                  | NM_133235        | 1.551                    | n.s.                    |
| <i>Pdk4</i>                     | O70571           | 1.525                    | 1.956                   |
| <i>Wasf3</i>                    | NM_145155        | -1.704                   | n.s.                    |
| <b>Hypothalamus</b>             |                  |                          |                         |
| <i>Ptprd</i>                    | Q64487           | 2.011                    | n.s.                    |
| <i>Arrdc2</i>                   | NM_027560.1      | 1.794                    | 2.462                   |

|                |                |        |       |
|----------------|----------------|--------|-------|
| <i>Tsc22d3</i> | NM_001077364.1 | 1.693  | 1.870 |
| <i>Sgk1</i>    | Q9WVC6         | 1.676  | 2.080 |
| <i>Cntnap2</i> | Q9CPW0         | 1.671  | n.s.  |
| <i>Cdkn1a</i>  | P39689         | 1.667  | 2.823 |
| <i>Tsc22d3</i> | NM_001077364.1 | 1.587  | 1.870 |
| <i>Fkbp5</i>   | Q64378         | 1.515  | 2.754 |
| <i>Arl4d</i>   | Q99PE9         | 1.510  | 2.237 |
| <i>Luzp1</i>   | NM_024452      | -1.652 | n.s.  |

**Ventral Tegmental Area**

|                |             |        |        |
|----------------|-------------|--------|--------|
| <i>Arrdc2</i>  | NM_027560   | 2.222  | 2.616  |
| <i>Ada</i>     | P03958      | 2.176  | 3.402  |
| <i>Sgk3</i>    | Q9ERE3      | 2.122  | 2.674  |
| <i>Sgk1</i>    | Q9WVC6      | 2.116  | 2.967  |
| <i>Cdkn1a</i>  | P39689      | 2.081  | 3.388  |
| <i>Pdk4</i>    | O70571      | 2.000  | 2.171  |
| <i>Pdk4</i>    | O70571      | 1.990  | 2.171  |
| <i>Angptl4</i> | NM_020581   | 1.862  | 3.081  |
| <i>Mertk</i>   | Q60805      | 1.721  | 2.014  |
| <i>Nfkbia</i>  | Q9Z1E3      | 1.635  | 1.784  |
| <i>Fkbp5</i>   | Q64378      | 1.613  | 2.102  |
| <i>Arl4d</i>   | Q99PE9      | 1.582  | 2.294  |
| <i>Slc2a4</i>  | P14142      | 1.556  | 1.309  |
| <i>Slc39a4</i> | NM_028064   | 1.539  | 2.274  |
| <i>Onecut2</i> | NM_194268   | -1.517 | -1.631 |
| <i>Arl15</i>   | NM_172595.4 | -1.516 | n.s.   |

---

n.s., no significant change in expression; qPCR, quantitative polymerase chain reaction.

**Table S3.** qPCR primer sequences

| <b>Gene Symbol</b> | <b>Gene Name</b>                                                                 | <b>Primer Sequence</b>                                           |
|--------------------|----------------------------------------------------------------------------------|------------------------------------------------------------------|
| <i>Ada</i>         | adenosine deaminase                                                              | F - ACGCAGACCCAGAGAGCTT<br>R - TCCAGGTGGACGTGTA ACTC             |
| <i>Angptl4</i>     | angiopoietin-like 4                                                              | F - AAGATGACCCAGCTCATTGG<br>R - ACTGTGCCTCTCCCCTTCTT             |
| <i>Arl4d</i>       | ADP-ribosylation factor-like 4D                                                  | F - GACGAGTCGGTGTCTGGTT<br>R - GGCCAAGAAGAGGAGACCTT              |
| <i>Arrdc2</i>      | arrestin domain containing 2                                                     | F - CGGAAGGTGTTCACTGTCATT<br>R - CACGTGTGCAGTACCAGGAT            |
| <i>Cdkn1a</i>      | cyclin-dependent kinase inhibitor 1a                                             | F - TCCACAGCGATATCCAGACA<br>R - AGAGACAACGGCACACTTTG             |
| <i>Fkbp5</i>       | FK506 binding protein 5                                                          | F - GGGAGATGGACACCAAAGAA<br>R - TCTCTGACAGGCCGTATTCC             |
| <i>Mertk</i>       | c-mer proto-oncogene tyrosine kinase                                             | F - GATGGCTACTCCCCACTTCA<br>R - ATGTGGCGAAGCAGAGGTAT             |
| <i>Nfkbia</i>      | nuclear factor kappa light polypeptide gene enhancer in B-cells inhibitor, alpha | F - CAGCTGACCCTGGAAAATCT<br>R - GCCTCCAAACACACAGTCAT             |
| <i>Pdk4</i>        | pyruvate dehydrogenase kinase, isoenzyme 4                                       | F - AGGGAGGTTCGAGCTGTTCT<br>R - GACGTTCTTTACAGGCATTT             |
| <i>Sgk1</i>        | serum/glucocorticoid regulated kinase 1                                          | F - CTGGGATGATCTCATCAATAAGAAG<br>R - GGTA AACTCGGGATCGAAGT       |
| <i>Sgk3</i>        | serum/glucocorticoid regulated kinase 3                                          | F - TTCCACCTCCATTTAACCCCTAA<br>R - ACTGGCATTACGATGGAAT           |
| <i>Slc2a4</i>      | solute carrier family 2 (facilitated glucose transporter), member 4              | F - GACGGACACTCCATCTGTTG<br>R - CTCAAAGAAGGCCACAAAGC             |
| <i>Slc39a4</i>     | solute carrier family 39 (zinc transporter), member 4                            | F - GAACTGGACGGCCTGTAAA<br>R - TGGACTCCAGGACTGATTCTG             |
| <i>Tbp</i>         | TATA box binding protein                                                         | F - AAAGGGAGAATCATGGACCAGAACAA<br>R - TGGACTAAAGATGGGAATTCCAGGAG |
| <i>Trp53inp1</i>   | transformation related protein 53 inducible nuclear protein 1                    | F - ACAACTCCTGTCCTGGTCTCA<br>R - AATGTGCTTCCCATTTCAC             |
| <i>Tsc22d3</i>     | TSC22 domain family, member 3                                                    | F - GGTGGCCCTAGACAACAAGA<br>R - TCAAGCAGCTCACGAATCTG             |

F, forward; R, reverse; qPCR, quantitative polymerase chain reaction. All primers were designed to cross introns and were tested to be efficient.
